# Supplementary material for: Multilayer networks reveal the spatial structure of seed-dispersal interactions across the Great Rift landscapes
Source: PubMed Central journal article supplement (PMC5762785; doi:10.1038/s41467-017-02658-y), 2018-01-10
Supplement: 41467_2017_2658_MOESM3_ESM.pdf [file 41467_2017_2658_MOESM3_ESM.pdf]

## **Description of Additional Supplementary Files**

File Name: Supplementary Data 1

Description: Full results of the comparison of the observed multilayer network descriptors against those predicted by null models.
